# Supplementary material
Source: publisher figshare collection journal article supplement (https://diabetesjournals.figshare.com/articles/dataset/_/14474037)
Supplement: Supplementary file 1 [file 1]

## Supplementary Figure Legends

**Supplementary Figure 1:** (A-C) Immunostaining of sections obtained from NP (A), PP1 (B) or PP21 (C) *Gcg<sup>iCre</sup>;R26<sup>Tom</sup>* dams for detection of glucagon (blue) along with tomato-red, showing expansion of tomato<sup>+</sup>/glucagon<sup>-</sup> cells in the PP21 islets. (D) Quantification of the number of tomato<sup>+</sup>/glucagon<sup>+</sup> cells in the indicated time points. Values are mean  $\pm$  SD of at least four biological replicates. \*\*p<0.001 by one-way ANOVA test. Tom: tomato-red, GCG: glucagon. NP: non-pregnant, PP1: post-partum day 1, PP21: post-partum day 21, GD17.5: gestational day 17.5. Scale bars 20 $\mu$ m.

## **Supplementary Figure 2: Pregnancy does not promote higher proliferation rate among $\alpha$ -cells.**

BrdU was given via drinking water between GD10.5 and PP1 at which the mice were euthanized. NP *Gcg<sup>iCre</sup>;R26<sup>Tom</sup>* females that were given BrdU for the same window of time served as control for baseline BrdU incorporation. (A, B) Detection of tomato-red in conjunction with BrdU (cyan) on sections obtained from NP (A) or PP1 (B) *Gcg<sup>iCre</sup>;R26<sup>Tom</sup>* dams. (C) Quantification of percentage of proliferating tomato-labeled cells among total tomato-positive cells. Values are mean  $\pm$  SD of five biological replicates. \*p<0.0001 by unpaired t-test. NP: non-pregnant, PP21: post-partum day 21. Scale bars 20 $\mu$ m.

## **Supplementary Figure 3: Lgr5-expressing cells are not detected prior to gestational day 15.**

(A) NP or *Lgr5<sup>CreERT</sup>;R26<sup>Tomato</sup>* dams that were treated with tamoxifen prior to mating were allowed to deliver and were euthanized at the time for weaning on PP21. No tomato-red labeled cells could be detected. (B) *Lgr5<sup>CreERT</sup>;R26<sup>Tomato</sup>* dams that were treated with tamoxifen on GD12 were euthanized on GD15. No tomato-red labeled cells could be detected. (C) *Lgr5<sup>CreERT</sup>;R26<sup>Tomato</sup>* dams that were treated with tamoxifen on GD12 were allowed to deliver and were euthanized at the time for weaning on PP21. No tomato-red labeled cells could be detected.

**Supplementary Figure 4: Identification of Lgr5-progenies in the adult mouse pancreas.**

(A, B) Detection of tomato-red, GFP (green), E-cadherin (blue) and Dapi (grey) in the intestine (A) or the pancreas of *Lgr5<sup>CreERT</sup>;R26<sup>Tomato</sup>* dams treated with tamoxifen on PP1 and euthanized on PP14. Scale bars 20μm.

(C-E) Detection of tomato-red along with somatostatin (green) and Dapi (blue) (C), pancreatic polypeptide (green) an Dapi (blue) (D), or insulin (green), glucagon (blue) and Dapi (grey) in pancreatic tissues of *Lgr5<sup>CreERT</sup>;R26<sup>Tomato</sup>* dams treated with tamoxifen on PP1 and euthanized on PP21. Ecad: E-cadherin, Tom: tomato-red, SOM: somatostatin, PP: pancreatic polypeptide, INS: insulin, GCG: glucagon, PP1: post-partum day 1, PP14: post-partum day 14, PP21: post-partum day 21. Scale bars 20μm.

## Research Methods

**Supplementary Table 1.**

| Antigen           | Species    | Comapany                        | Cat. No.    | Dilution                   |
|-------------------|------------|---------------------------------|-------------|----------------------------|
| Amylase           | rabbit     | Sigma                           | A8273       | 1:300                      |
| BrdU              | rat        | Abcam                           | Ab6326      | 1:100                      |
| Cleaved Caspase-3 | mouse      | Abcam                           | Ab208161    | 1:200                      |
| CD90.1-VioBlue    | mouse      | Miltenyi                        | 130-102-637 | 1:10 (Flow)                |
| Cytokeratin       | rabbit     | DAKO                            | Z0622       | 1:100                      |
| DBA               | biotin     | Vector Lab                      | B1035       | 1:100 (Flow)               |
| E-cadherin        | goat       | R&D                             | AF748       | 1:200 (IF)<br>1:100 (Flow) |
| F4/80             | rat        | Invitrogen                      | MF48000     | 1:100                      |
| GFP               | rabbit     | Life tech.                      | A6455       | 1:500                      |
| GFP               | goat       | Abcam                           | ab5450      | 1:500                      |
| Glucagon          | guinea pig | Linco/Millipore                 | 4031-01F    | 1:1000                     |
| Glucagon          | rabbit     | Linco/Millipore                 | 4030-01F    | 1:1000                     |
| Insulin           | guinea pig | Linco/Millipore                 | 4011-01     | 1:1000                     |
| PP                | guinea pig | DAKO                            | 4041-01     | 1:200                      |
| Pdx1              | goat       | Abcam                           | ab47383     | 1:2000                     |
| Somatostatin      | goat       | Santa Cruz                      | sc-7819     | 1:100                      |
| Urocortin-3       | rabbit     | P. Sawchenko,<br>Salk Institute | N/A         | 1:1500                     |

All of the secondary antibodies used for Immunostaining were purchased from Jackson ImmunoResearch Laboratories: biotin-conjugated anti-rabbit (1:500), biotin-conjugated anti-rat (1:500), biotin conjugated anti-guinea pig (1:500), biotin-conjugated anti-goat (1:250); Cy2-conjugated streptavidin (1:500); Cy3-conjugated streptavidin (1:500); Cy5-conjugated streptavidin (1:100); and Cy2- and Cy3- anti-guinea pig, anti-rabbit, anti-rat, anti-goat (all 1:300). For flow cytometry, secondary antibodies used were Cy5 anti-goat, anti-rat, anti-rabbit

(1:100), Cy5-conjugated streptavidin (1:100) and Donkey anti-Goat IgG (H+L) Alexa Fluor® 350 conjugate (Thermo fisher).
